# Supplementary material
Source: PubMed Central journal article supplement (PMC3993384)
Supplement: IAI.00969-13_zii999090594so1.pdf [file IAI.00969-13_zii999090594so1.pdf]

**Supplemental Table 1. Gene expression changes in lymph nodes induced after four-day infection or immunization with *B. burgdorferi*.**

| Gene <sup>a</sup> | Infected <sup>b</sup> | Immunized <sup>b</sup> | FD <sup>c</sup> |
|-------------------|-----------------------|------------------------|-----------------|
| Cxcl13            | 122                   | 66                     | 1.8             |
| Cxcl12            | 61                    | 31                     | 1.9             |
| <b>Cxcr2</b>      | 32                    | 6.3                    | 5.1             |
| Xcl1              | 30                    | 18                     | 1.6             |
| Cxcl10            | 25                    | 16                     | 1.5             |
| Tnfrsf1a          | 16                    | 6                      | 2.7             |
| Tnfsf14           | 12                    | 10                     | 1.2             |
| Cmtm4             | 8.0                   | 3.6                    | 2.2             |
| <b>Ccl20</b>      | 4.0                   | -2.0                   | 7.9             |
| <b>IL4</b>        | -4.0                  | 1.5                    | -6.0            |
| Ccbp2             | -7.7                  | -3.3                   | -2.3            |
| <b>Ccl2</b>       | -16                   | -1.2                   | -13             |
| <b>Cmtm6</b>      | -65                   | -2.1                   | -31             |

<sup>a</sup> Genes > 4-fold changed after infection compared to non-manipulated lymph nodes. In bold those that were tested by qRT-PCR. Only one, IL-4, was confirmed to be expressed significantly higher in immunized compared to infected mice (see Fig. 3). Other genes tested: *Aplnr*, *Bdnf*, *Cxcr5*, *Bmp10*, *Bmp15*, *Bmp6*, *Ccbp2*, *Ccl1*, *Ccl11*, *Ccl12*, *Ccl17*, *Ccl19*, *Ccl2*, *Ccl20*, *Ccl4*, *Ccl5*, *Ccl6*, *Ccl7*, *Ccl8*, *Ccl9*, *Ccr1*, *Ccr11*, *Ccr2*, *Ccr3*, *Ccr4*, *Ccr6*, *Ccr7*, *Ccr8*, *Ccr9*, *Ccr11*, *Ccr12*, *Cmtm2a*, *Cmtm3*, *Cmtm4*, *Cmtm5*, *Cmtm6*, *Cmklr1*, *Cxcr7*, *Csf1*, *Csf2*, *Cx3cl1*, *Cx3cr1*, *Cxcl1*, *Cxcl10*, *Cxcl11*, *Cxcl12*, *Cxcl13*, *Cxcl15*, *Cxcl2*, *Pf4*, *Cxcl5*, *Ppbp*, *Cxcl9*, *Cxcr3*, *Cxcr4*, *Cxcr6*, *Tymp*, *Gdf5*, *Ccr10*, *Gpr81*, *Hif1a*, *Il13*, *Il16*, *Il18*, *Il1a*, *Il4*, *Cxcr1*, *Cxcr2*, *Inha*, *Inhbb*, *Lif*, *Ltb4r2*, *Mmp2*, *Myd88*, *Nfkb1*, *Rgs3*, *Slit2*, *Tlr4*, *Tnf*, *Tnfrsf1a*, *Tnfsf14*, *Trem1*, *Xcl1*. Housekeeping genes: *Gusb*, *Hprt*, *Hsp90ab1*, *Gapdh*, *Actb*

<sup>b</sup> Fold-difference in lymph node gene expression compared to non-manipulated lymph node

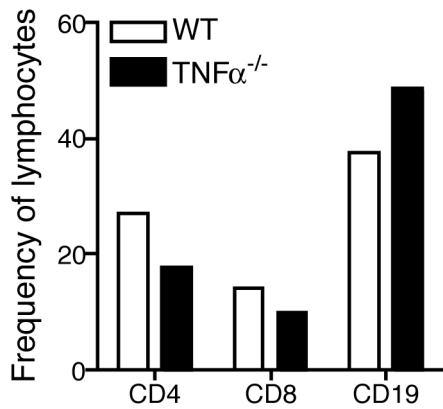

Supplemental Figure 1: Lack of TNF- $\alpha$  does not reduce B cell accumulation in draining lymph nodes after infection with *B. burgdorferi*. Shown are mean frequencies of indicated cell types in draining right inguinal lymph nodes of wildtype (WT, open bars) and TNF- $\alpha$ -/- mice (n = 2) infected with host-adapted *B. burgdorferi* 10 days prior to analysis. TNF- $\alpha$  was not required for strong B cell accumulation.

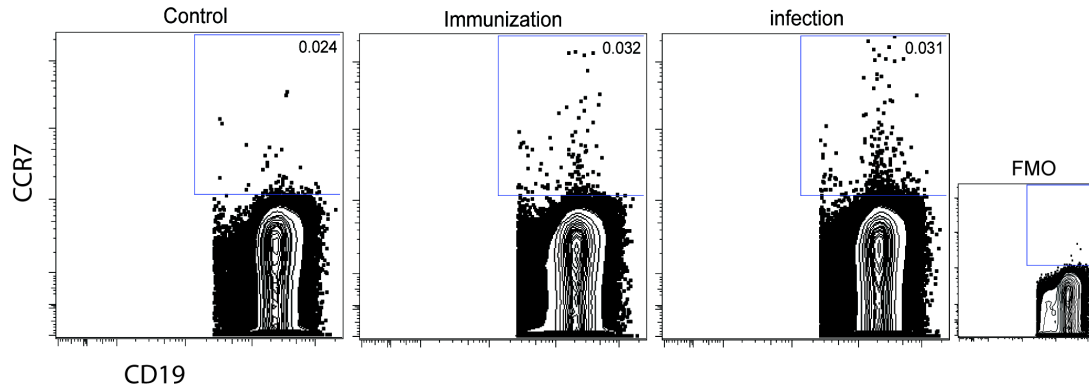

Supplemental Figure 2: Small numbers CCR7+ B cells are induced by infection with *B. burgdorferi*. Shown are representative samples of draining lymph nodes (n = 3) from non-infected wildtype control mice, mice immunized 6-days prior with *B. burgdorferi* lysate in CFA or infected with host-adapted *B. burgdorferi* spirochetes analyzed by multicolor flow cytometry and gated on live, CD3, 4, 8, F4/80 negative CD19+ cells. Frequencies indicate the number of CCR7+ B cells. FMO, fluorescent minus one control stain lacking CCR7 antibodies.
